# Supplementary material
Source: publisher figshare collection journal article supplement (https://karger.figshare.com/ndownloader/files/5464952)

## Supplementary Data

**Table 1: Primary cause of AKI**

| Primary cause of AKI                   | Total patients (%)<br>N=176 |
|----------------------------------------|-----------------------------|
| Sepsis syndrome                        | 75 (43%)                    |
| Infection / sepsis                     | 67                          |
| Pancreatitis                           | 8                           |
| Extracellular fluid depletion          | 28 (16%)                    |
| Dehydration                            | 10                          |
| Abdominal Aorta Aneurysm (AAA) rupture | 4                           |
| ALD / hepatorenal syndrome             | 8                           |
| Bleed other than AAA                   | 6                           |
| Heart failure                          | 21 (12%)                    |
| Heart failure                          | 8                           |
| Myocardial infarct                     | 7                           |
| Cardiac arrest                         | 6                           |
| Intrinsic renal                        | 12 (7%)                     |
| CKD progression                        | 3                           |
| Rhabdomyolysis                         | 3                           |
| Vasculitis                             | 2                           |
| Acute Interstitial Nephritis           | 2                           |
| Minimal Change Disease                 | 1                           |
| Henoch Schönlein Purpura               | 1                           |
| Obstructive uropathy                   | 5 (3%)                      |
| Nephrotoxins as single primary cause   | 4 (2%)                      |
| Oral nephrotoxic medication            | 3                           |
| Intravenous contrast                   | 1                           |
| Multiple organ failure / other         | 31 (17%)                    |
| Post-op                                | 21                          |
| Malignancy                             | 4                           |
| Renal artery stenosis                  | 2                           |
| Status epilepticus                     | 1                           |
| Road Traffic Accident                  | 1                           |
| Ischaemic stroke                       | 1                           |
| Compartment syndrome                   | 1                           |

**Table 2: Cause of death**

| <b>Cause of death</b>                | <b>Total patients (%)<br/>N=94</b> |
|--------------------------------------|------------------------------------|
| Sepsis syndrome                      | 28 (30%)                           |
| Cardiovascular                       | 23 (24%)                           |
| Cardiac arrest                       | 11                                 |
| Heart failure                        | 5                                  |
| Bleed                                | 3                                  |
| Sudden death / MI                    | 1                                  |
| Ischaemic stroke                     | 1                                  |
| Haemorrhagic stroke                  | 1                                  |
| Limb ischaemia                       | 1                                  |
| Malignancy                           | 16 (17%)                           |
| Liver disease / hepatorenal syndrome | 10 (11%)                           |
| Other                                | 9 (10%)                            |
| Multiple Organ Failure               | 3                                  |
| Respiratory failure                  | 2                                  |
| Frailty                              | 2                                  |
| Status epilepticus                   | 1                                  |
| Bowel perforation                    | 1                                  |
| Unknown                              | 8 (8%)                             |

**Table 3: Pathophysiology of medication interacting with the renovascular system.**

| <b>Agent</b>                      | <b>Causal path of AKI</b>                                                                                                                                                                                                    | <b>Number of patients affected<br/>N=37</b> |
|-----------------------------------|------------------------------------------------------------------------------------------------------------------------------------------------------------------------------------------------------------------------------|---------------------------------------------|
| <b>ACEi/ARB/Antihypertensives</b> | Reduction of auto regulation of GFR in context of reduced effective plasma volume (e.g. in sepsis)                                                                                                                           | 22                                          |
| <b>Trimethoprim</b>               | Exacerbation of hyperkalaemia and reduced                                                                                                                                                                                    | 2                                           |
| <b>Metformin</b>                  | Exacerbation of acidaemia                                                                                                                                                                                                    | 8                                           |
| <b>Opioids</b>                    | Reduction of effective plasma volume due to vasodilation                                                                                                                                                                     | 2                                           |
| <b>NSAIDs</b>                     | In context of reduced effective plasma volume inappropriate prostaglandin inhibition causes vasodilation. This causes reduced renal perfusion and reduced RAS-activity. NSAID induced interstitial nephritis is less common. | 2                                           |
| <b>Contrast</b>                   | Vasoconstriction causing reduced medullary perfusion and direct tubular toxicity                                                                                                                                             | 11                                          |

In thirty-seven patients interacting drugs were identified of which seventeen patients received more than one type of interacting drugs.

ACEi: Angiotensin Converting Enzyme inhibitor, ARB: Angiotensin-Receptor Blocker, GFR: Glomerular Filtration Rate, NSAIDs: Non-Steroidal Anti-Inflammatory Drugs, RAS: Renin-Angiotensin System.

**Figure 1: Medication use as primary cause or contributing factor to the development of AKI in our population**

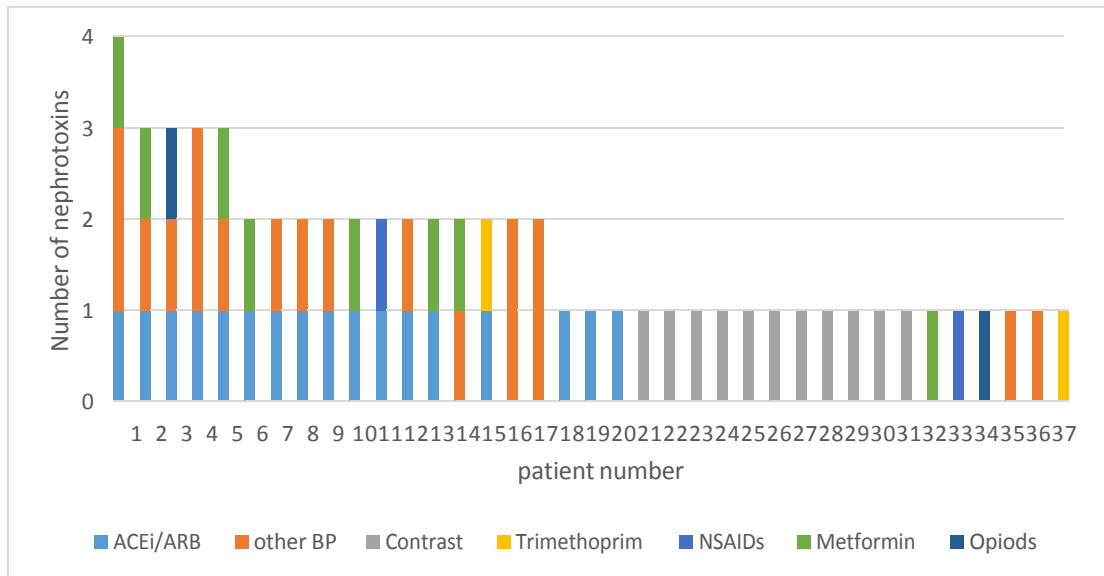

Supplement: Supplementary file 1 [file 5464952]
